# Supplementary material for: Unravelling fullerene–perovskite interactions introduces advanced blend films for performance-improved solar cells
Source: Royal Society of Chemistry journal article supplement (doi:10.1039/c9se00438f), 2019-01-01
Supplement: c9se00438f1.pdf [file c9se00438f1.pdf]

## Supporting Information

### Unravelling Fullerene-Perovskite Interactions Introduces Advanced Blend Films for Performance-Improved Solar Cells

*Jorge Pascual, Silvia Collavini, Sebastian F. Völker, Nga Phung, Elisa Palacios-Lidon, Lourdes Irusta, Hans-Jürgen Grande, Antonio Abate, Ramón Tena-Zaera,\* Juan Luis Delgado\**

This Supporting Information contains additional NMR and FTIR spectra, supporting the ideas proposed in the main text as conclusion of the discussion of the obtained results about perovskite-fullerene interactions. Moreover, the synthetic details and characterization by  $^1\text{H}$ - and  $^{13}\text{C}$ -NMR, FTIR, UV-vis spectroscopies and cyclic voltammogram of the novel fullerene are included. Topography and phase AFM images of  $\text{C}_{70}$ - and **FU11**-containing perovskite layers are also available in this text. Finally, the statistics of every PV parameter in the three different configurations have been included.

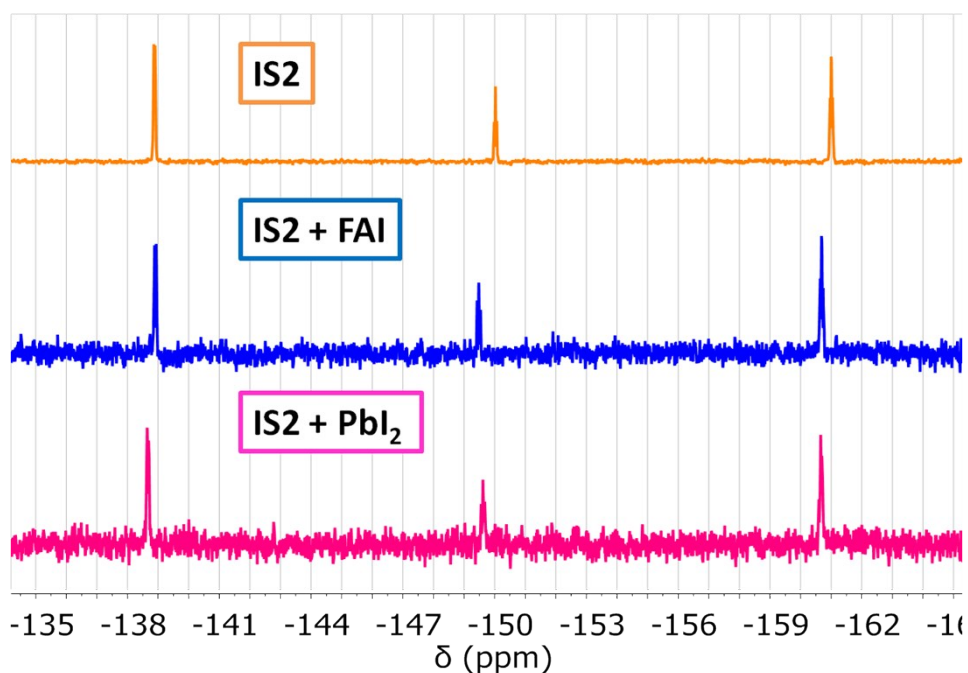

**Figure S1.**  $^{19}\text{F}$ -NMR spectra of **IS2**-saturated DMF:DMSO (4:1) solution and in presence of FAI and  $\text{PbI}_2$  separately.

### Synthesis of FU11:

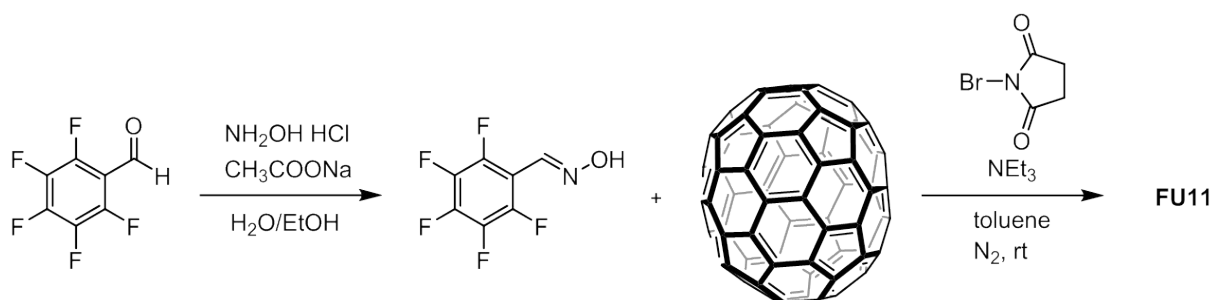

### Scheme S1. Synthesis of FU11.

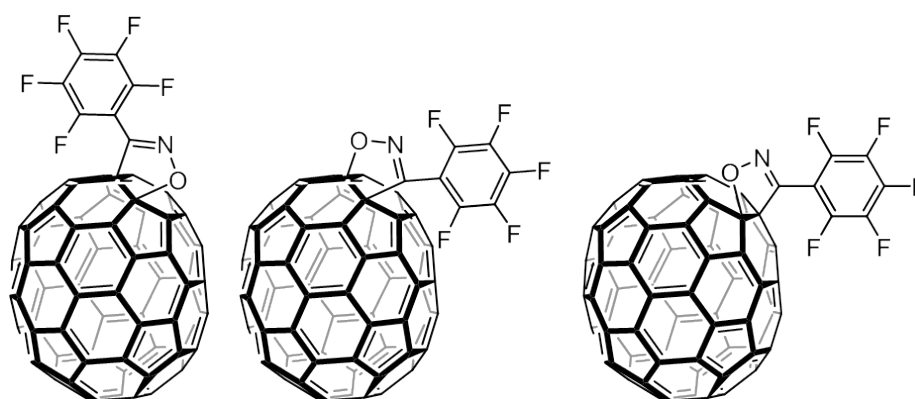

2,3,4,5,6-pentafluorobenzaldehyde oxime (89.0 mg, 420  $\mu\text{mol}$ ) and *N*-bromosuccinimide (75 mg, 420  $\mu\text{mol}$ ) were dissolved in anhydrous toluene under nitrogen atmosphere and stirred at r.t. for 30 min.  $\text{C}_{70}$  (118 mg, 140  $\mu\text{mol}$ ) and  $\text{NEt}_3$  (60  $\mu\text{l}$ , 420  $\mu\text{mol}$ ) were added and the mixture stirred at r.t. for 2 h. The solvent was removed under reduced pressure and the residue purified by column chromatography (eluent:  $\text{CS}_2$ ). The product was precipitated from  $\text{CHCl}_3$  to pentane to obtain 34 mg (32.4  $\mu\text{mol}$ , 23%) of a brown solid.

### 3 isomers

$^{19}\text{F}$ -NMR (376.4 MHz,  $\text{CDCl}_3$ ):

$\delta$ [ppm] = -134.8 – -135.6 (2 F), -147.2 – -147.8 (1 F), -158.3 – -159.1 (2 F)

**MALDI-TOF (high resolution):**  $[\text{M}^+]$  calculated: 1048.9895 m/z; found: 1048.9942 m/z

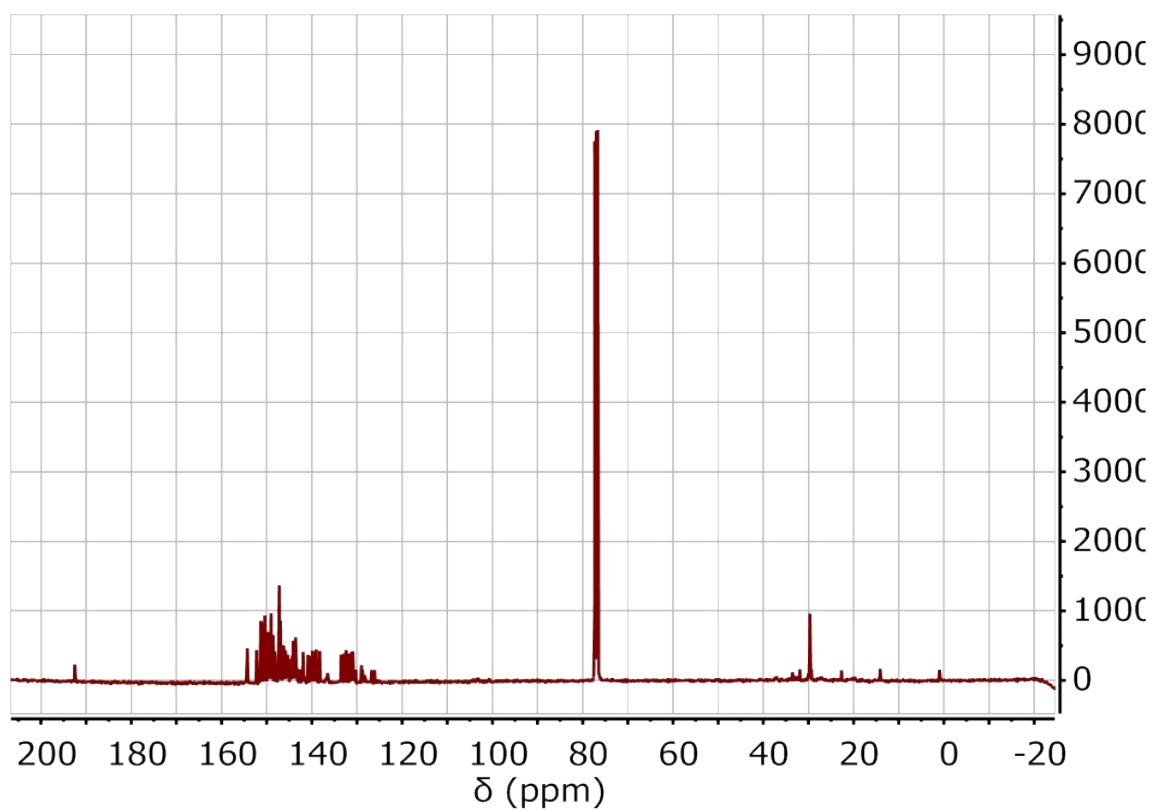

**Figure S2.**  $^{13}\text{C}$ -NMR spectrum of FU11.

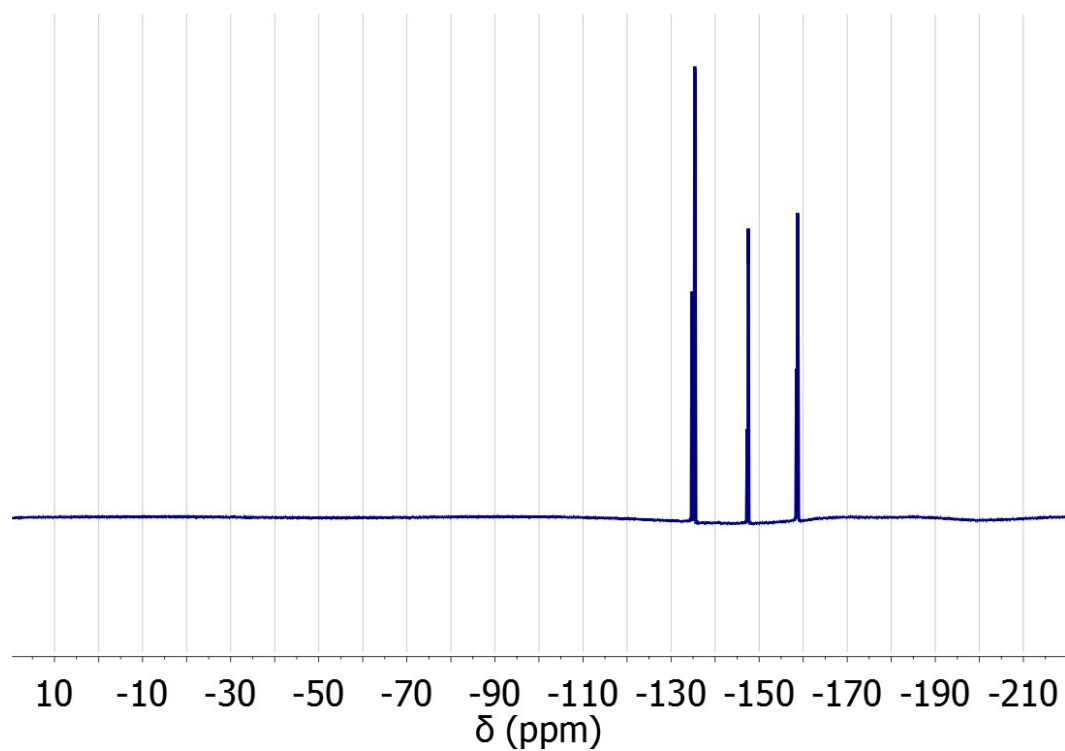

**Figure S3.**  $^{19}\text{F}$ -NMR spectrum of FU11.

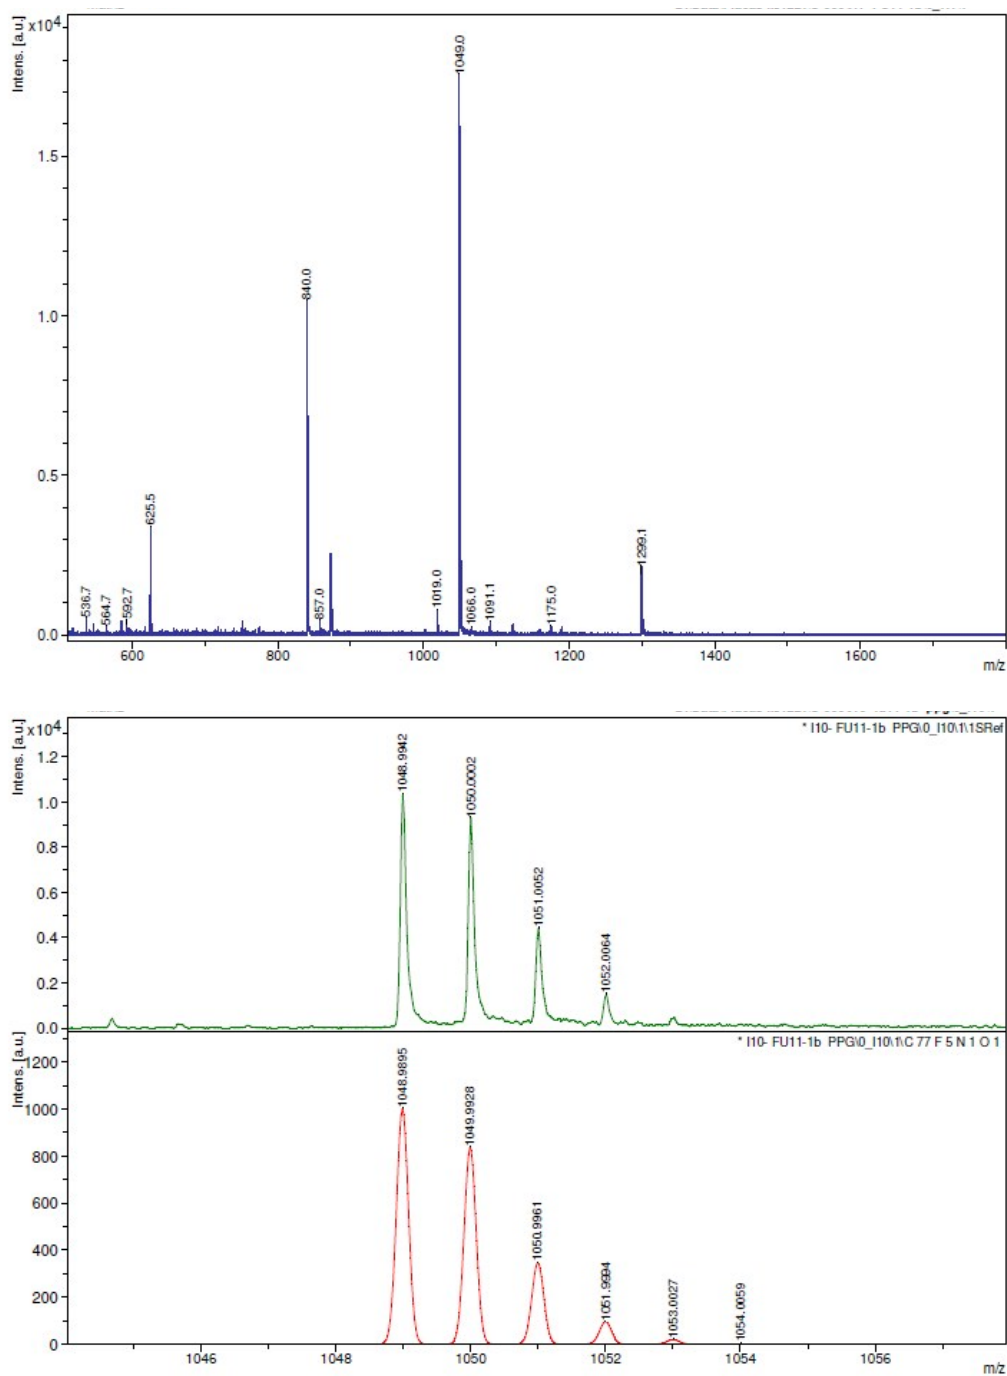

**Figure S4.** Mass spectra (high resolution below) of FU11.

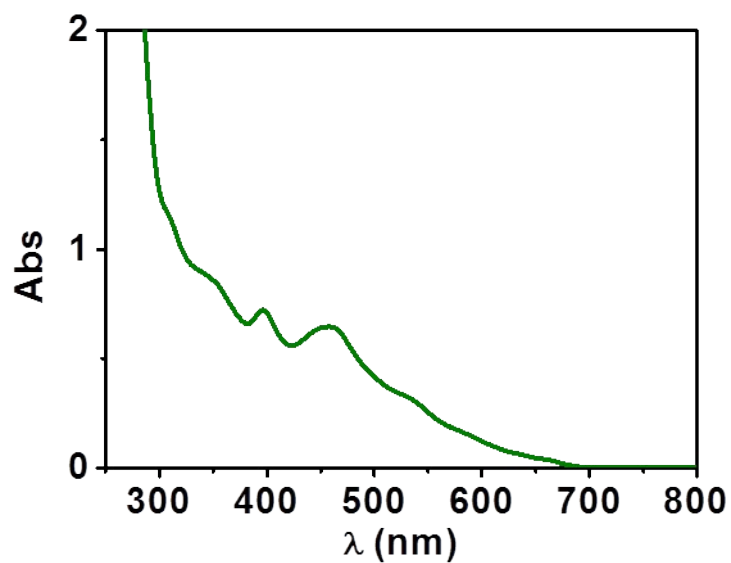

**Figure S5.** UV-vis spectrum of **FU11** in  $\text{CH}_2\text{Cl}_2$ . A bandgap value of 2.64 eV was extrapolated.

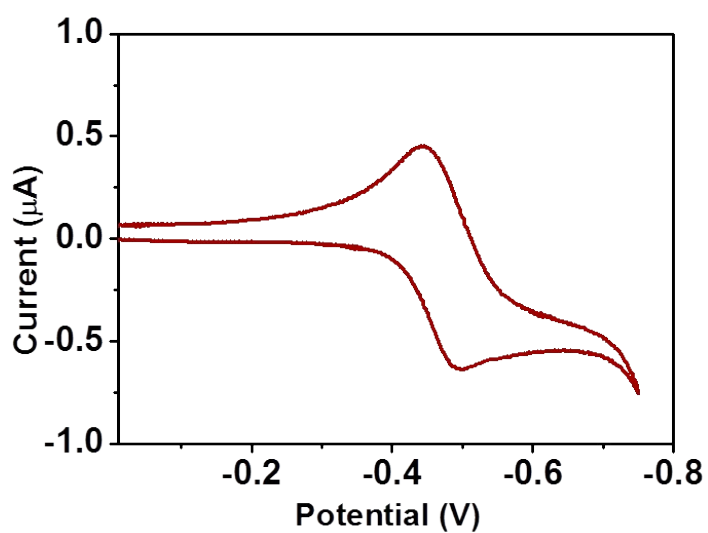

**Figure S6.** Cyclic voltammogram of **FU11** in DCM/TBAHFP (0.1M) vs.  $\text{Fc}/\text{Fc}^+$  at a scanning rate of  $250 \text{ mV s}^{-1}$ . LUMO energy level was calculated using the formula:  $E(\text{LUMO}) = -4.8 \text{ eV} - (E_{1/2\text{red}}) = -3.87 \text{ eV}$ . HOMO level was calculated through the formula:  $E(\text{LUMO}) - \text{bandgap} = -6.51 \text{ eV}$ .

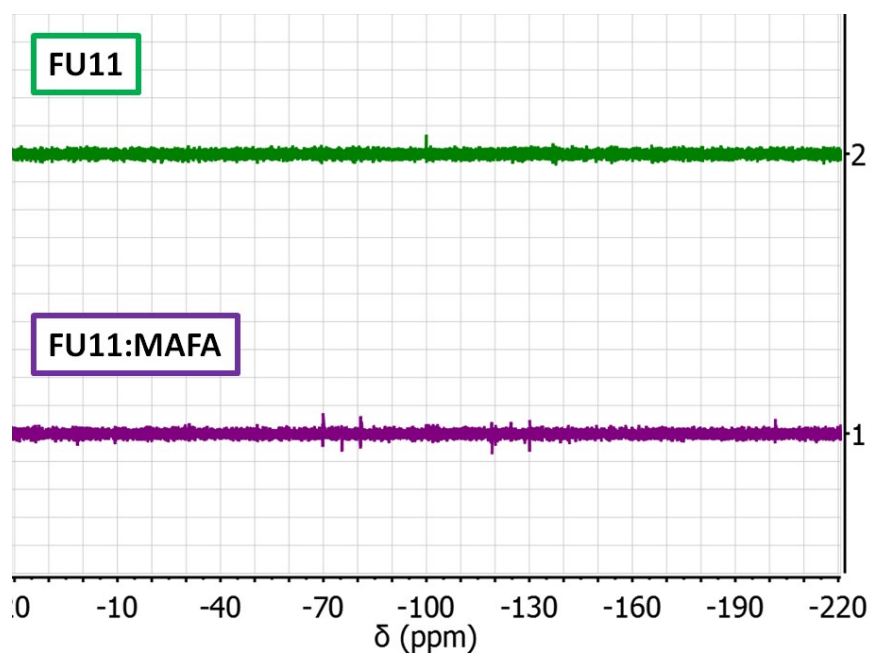

**Figure S7.**  $^{19}\text{F}$ -NMR spectra of **FU11**-saturated solution in DMF:DMSO (4:1) with and without MAFA perovskite (1.2 M).

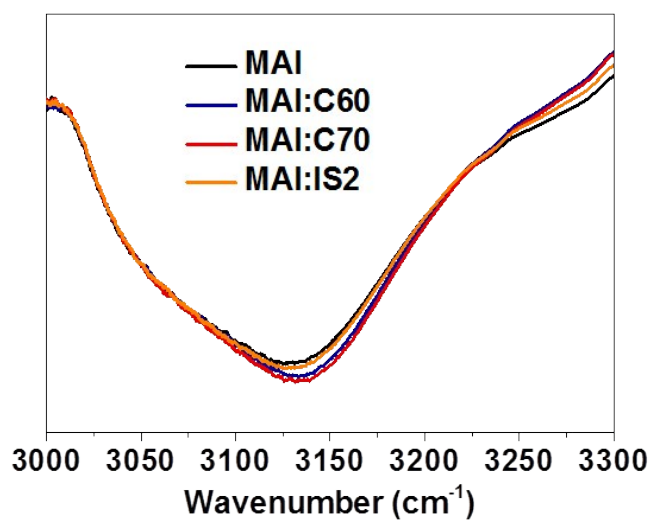

**Figure S8.** FTIR spectra of MAI solutions (1.5 M) in DMSO and in the presence of different fullerenes.

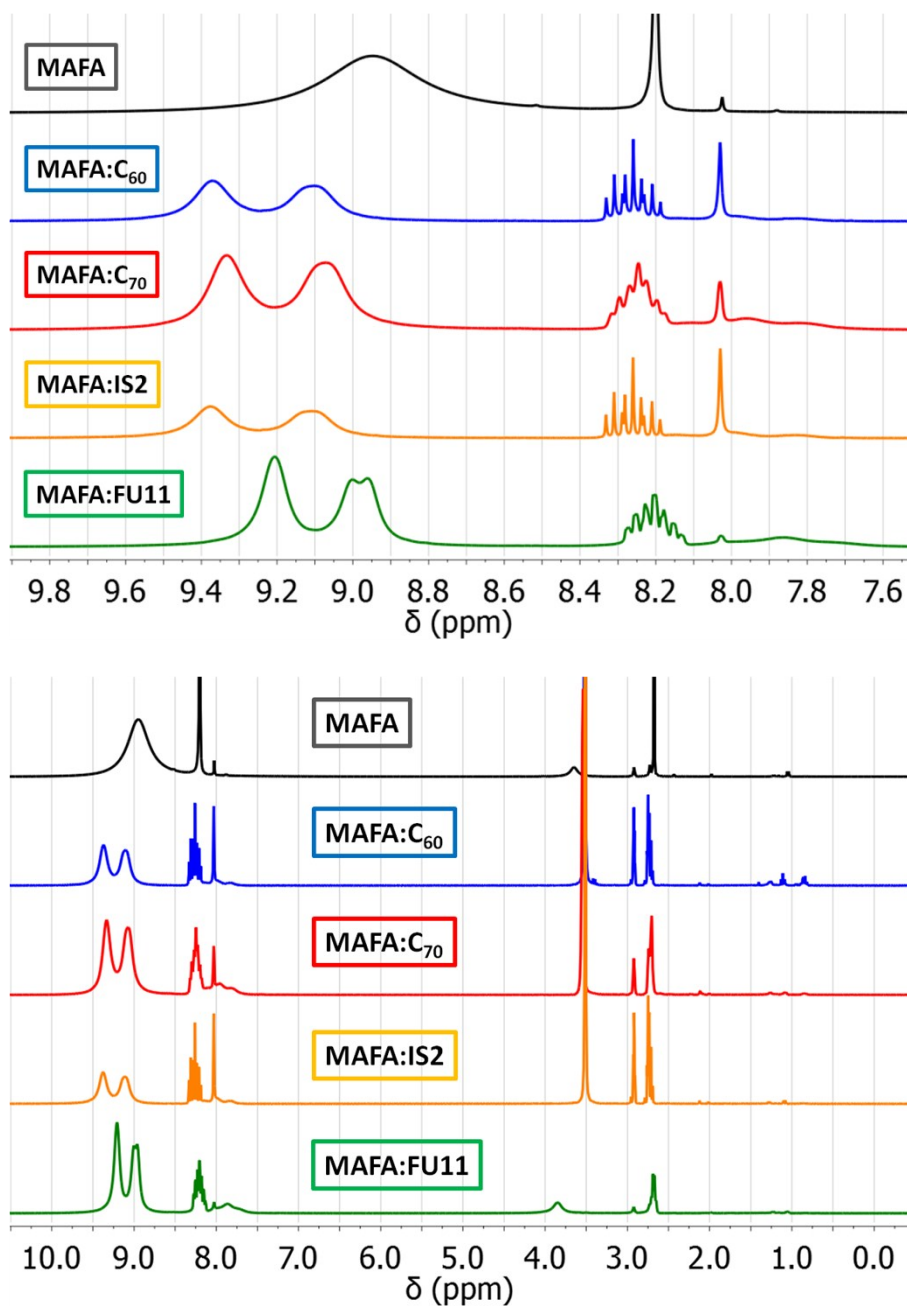

**Figure S9.**  $^1\text{H}$ -NMR spectra of MAFA perovskite solutions (1.2 M) in DMF:DMSO (4:1) and in the presence of different fullerenes and **FU11** (full spectra below). The signal of FA protons at 8.95 ppm split and get shifted to higher chemical shift values in the presence of fullerenes.

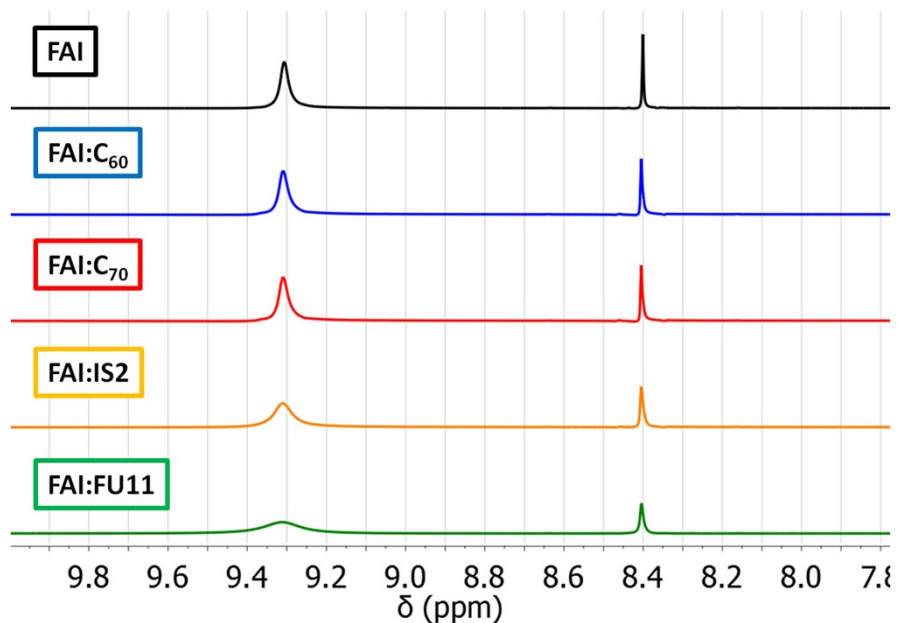

**Figure S10.**  $^1\text{H}$ -NMR spectra of FAI solutions (1.5 M) in DMF:DMSO (4:1) and in the presence of different fullerenes and **FU11**.

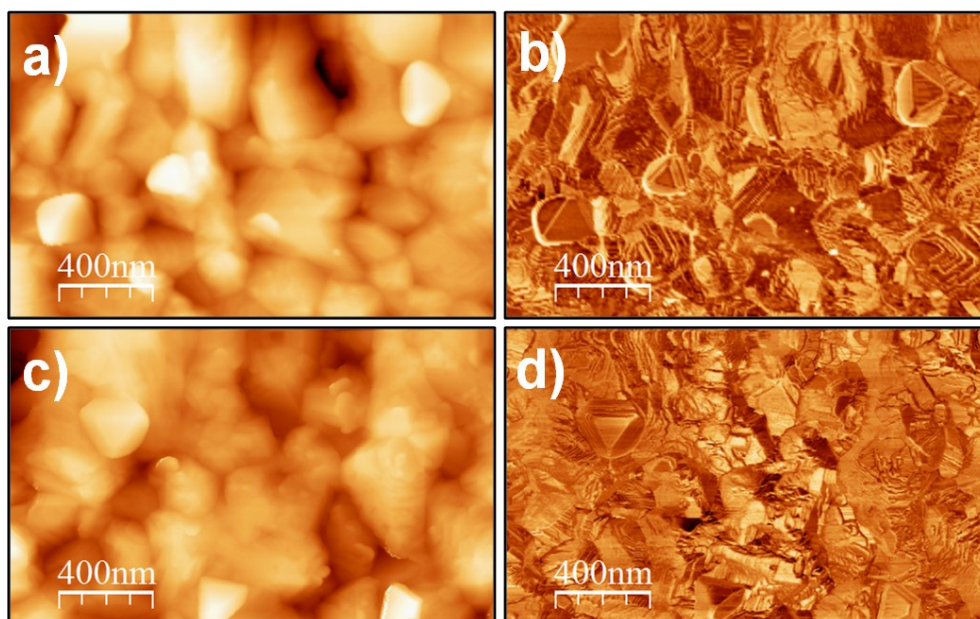

**Figure S11.** Topography ( $z = 170 \text{ nm}$ ) and phase AFM images for the a) and b)  $\text{C}_{70}$ -containing and c) and d) **FU11**-containing perovskite layers at the initial measurement stage. Both samples present a very similar topography and phase signal without any remarkable fullerene type related features.



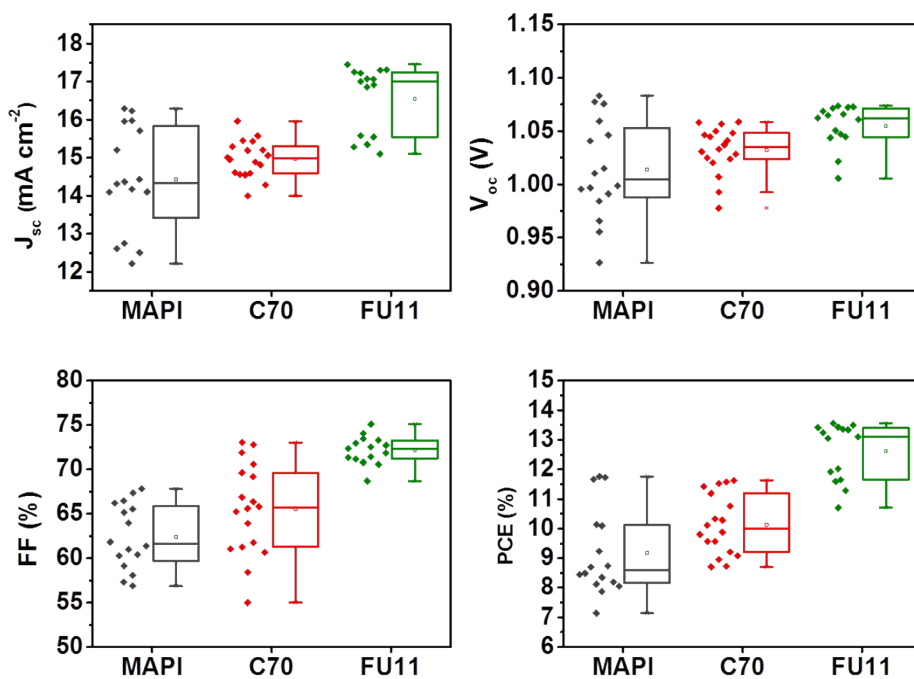

**Figure S12.** PV parameters of PSCs in ETL-free configuration.

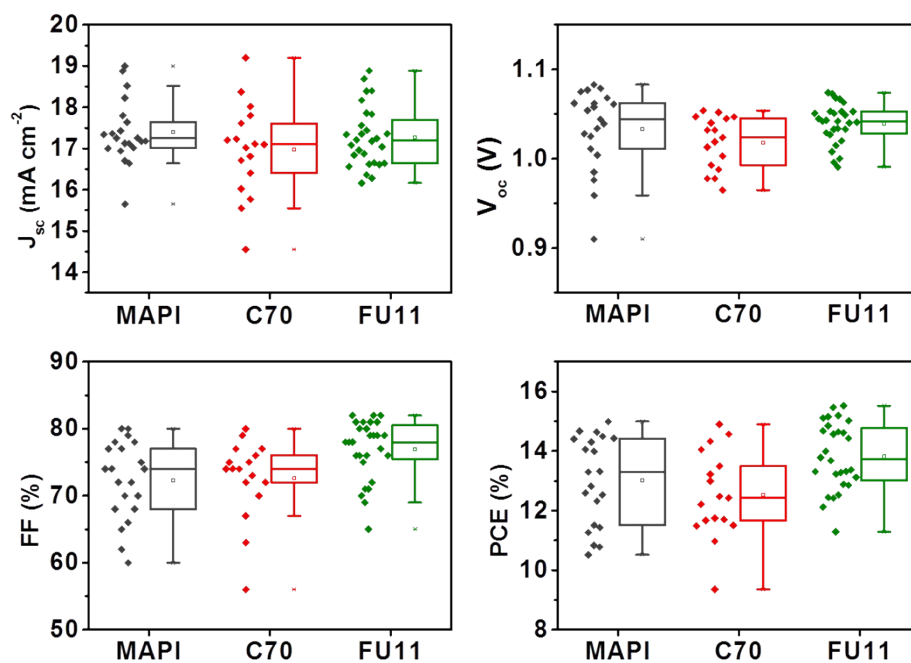

**Figure S13.** PV parameters of PSCs in n-i-p configuration.

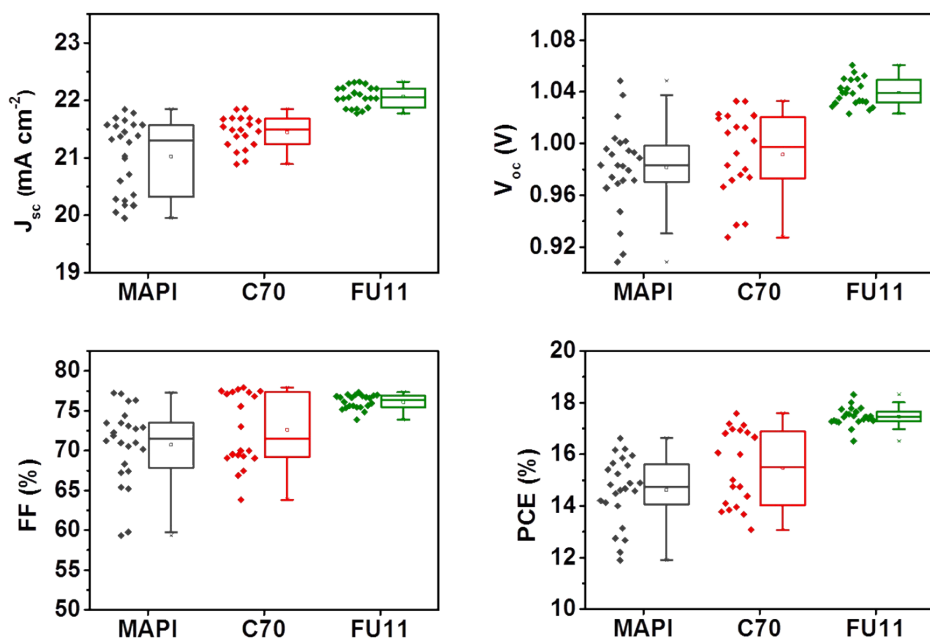

**Figure S14.** PV parameters of PSCs in p-i-n configuration.
